# Supplementary material
Source: PubMed Central journal article supplement (PMC3732548)

A

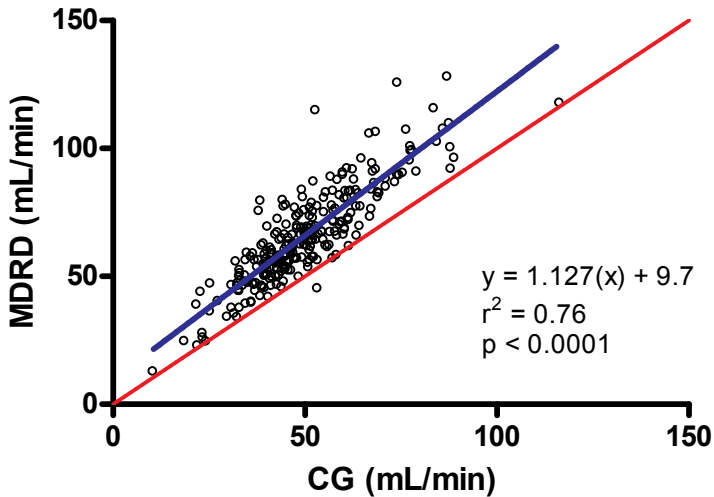

Supplement: NIHMS460125-supplement-Supp_Fig_S1_A_.pdf [file NIHMS460125-supplement-Supp_Fig_S1_A_.pdf]

B

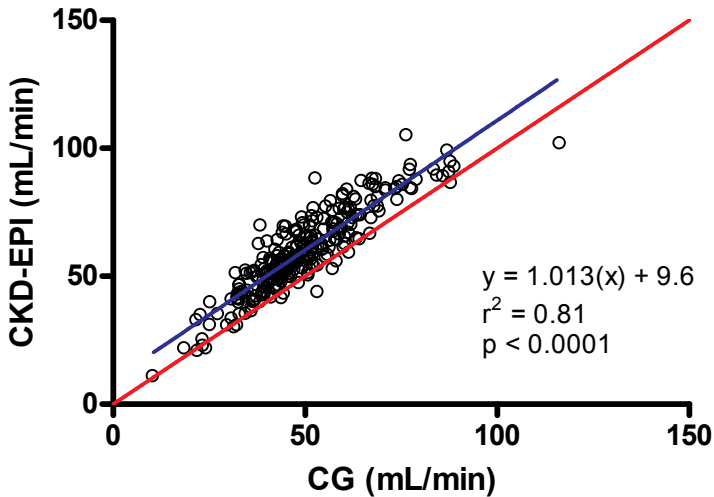

Supplement: NIHMS460125-supplement-Supp_Fig_S1_B_.pdf [file NIHMS460125-supplement-Supp_Fig_S1_B_.pdf]

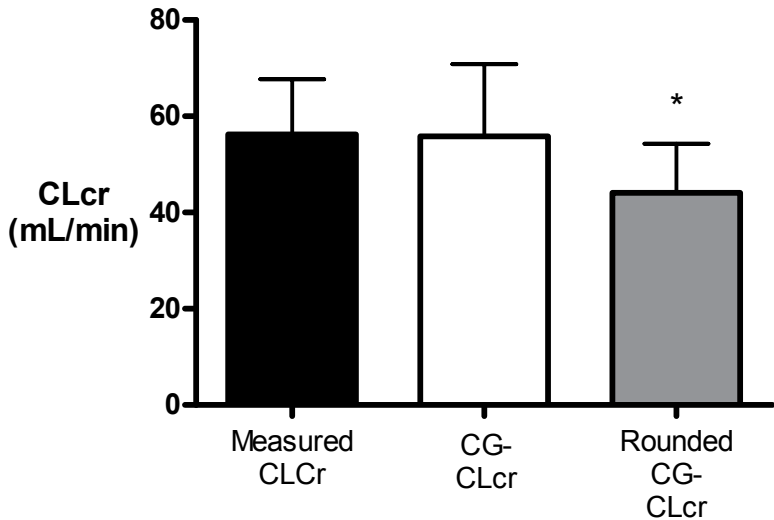

Supplement: NIHMS460125-supplement-Supp_Fig_S2.pdf [file NIHMS460125-supplement-Supp_Fig_S2.pdf]
